# Supplementary material for: Silver Nanoparticles Functionalized Nanosilica Grown over Graphene Oxide for Enhancing Antibacterial Effect
Source: MDPI journal article supplement (doi:10.3390/nano12193341), 2022-09-25
Supplement: s1 [file s1]

Supplementary Materials

# Silver Nanoparticles Functionalized Nanosilica Grown over Graphene Oxide for Enhancing Antibacterial Effect

Qui Quach and Tarek M. Abdel-Fattah \*

Applied Research Center at Thomas Jefferson National Accelerator Facility, Department of Molecular Biology and Chemistry, Christopher Newport University, Newport News, VA 23606, USA

\* Correspondence: fattah@cnu.edu

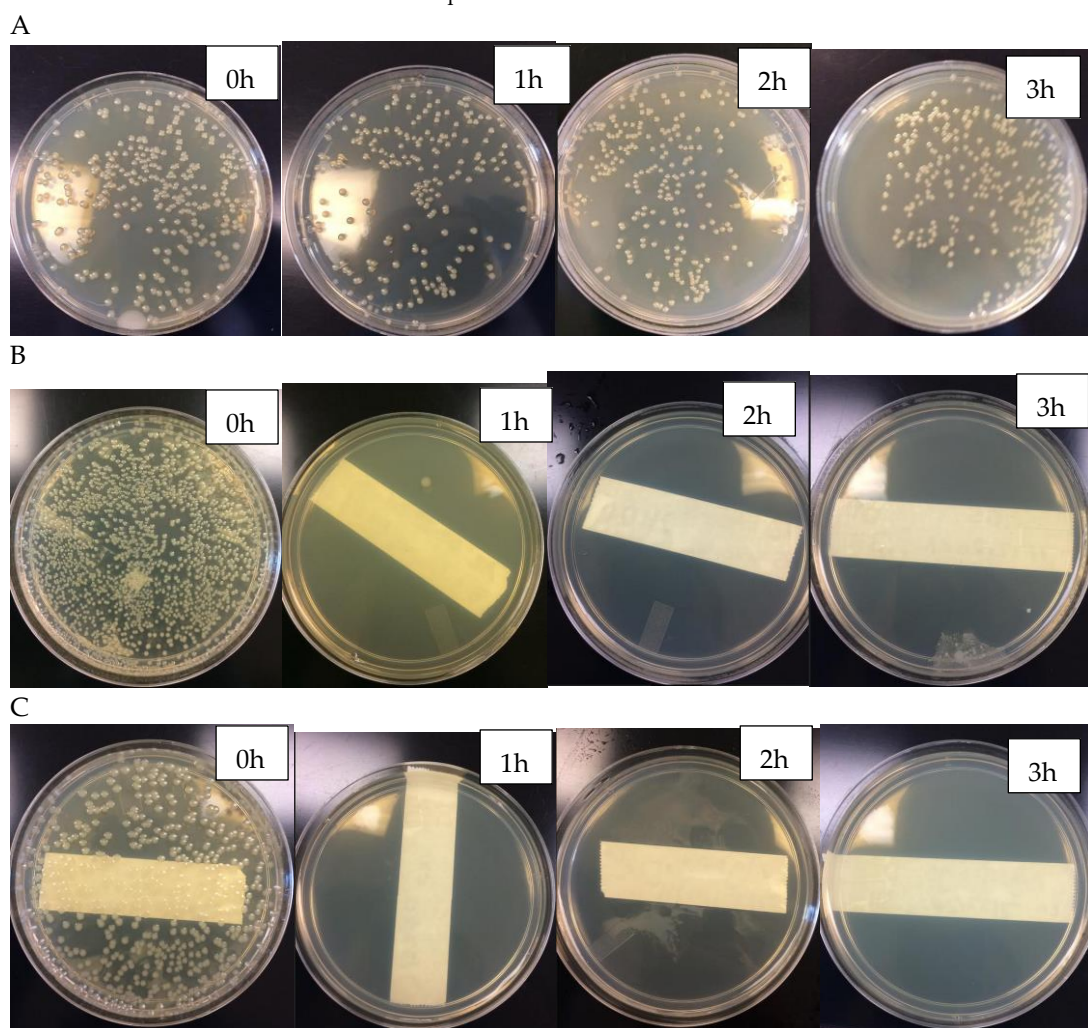

**Figure S1:** Examples of Colony Forming Unit (CFU) plate count images of A) The control *E.coli* samples from 0h to 3h, B) The *E.coli* +GO/NS from 0h to 3h, C) The *E.coli*+GO/NS/AgNPs from 0h to 3h.

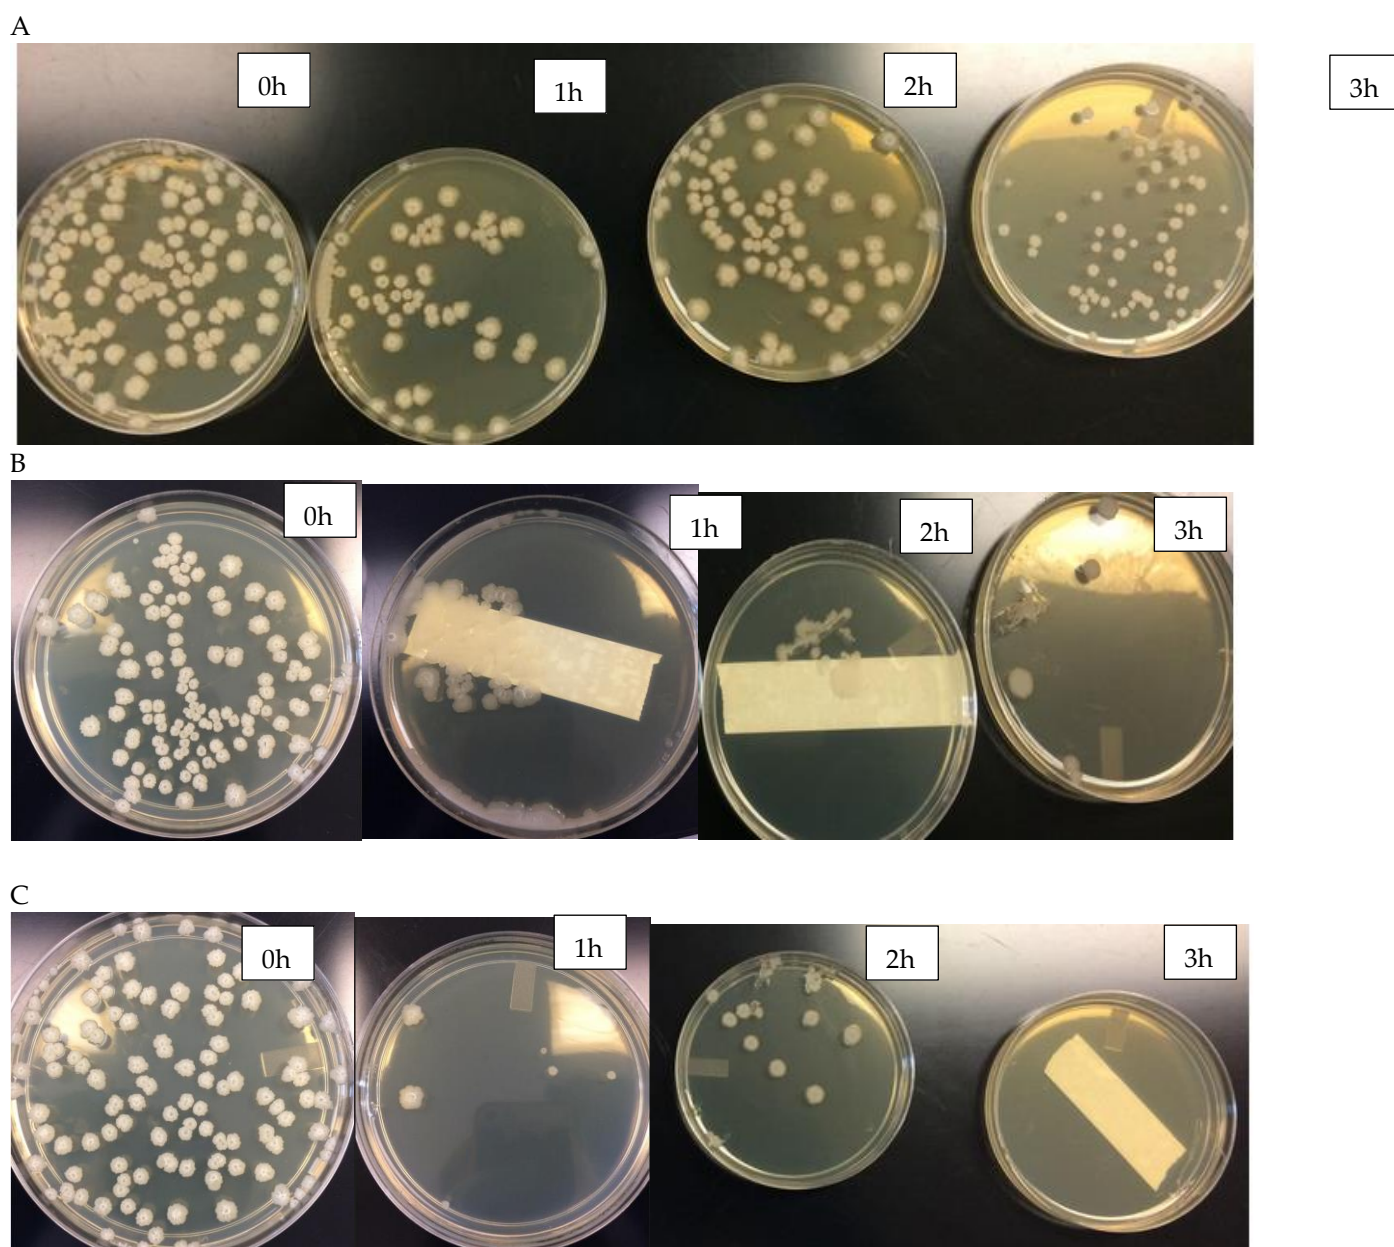

**Figure S2:** Examples of Colony Forming Unit (CFU) plate count images of A) The control *B. subtilis* samples from 0h to 3h, B) The *B. Subtilis* +GO/NS from 0h to 3h, C) The *B. subtilis* +GO/NS/AgNPs from 0h to 3h.

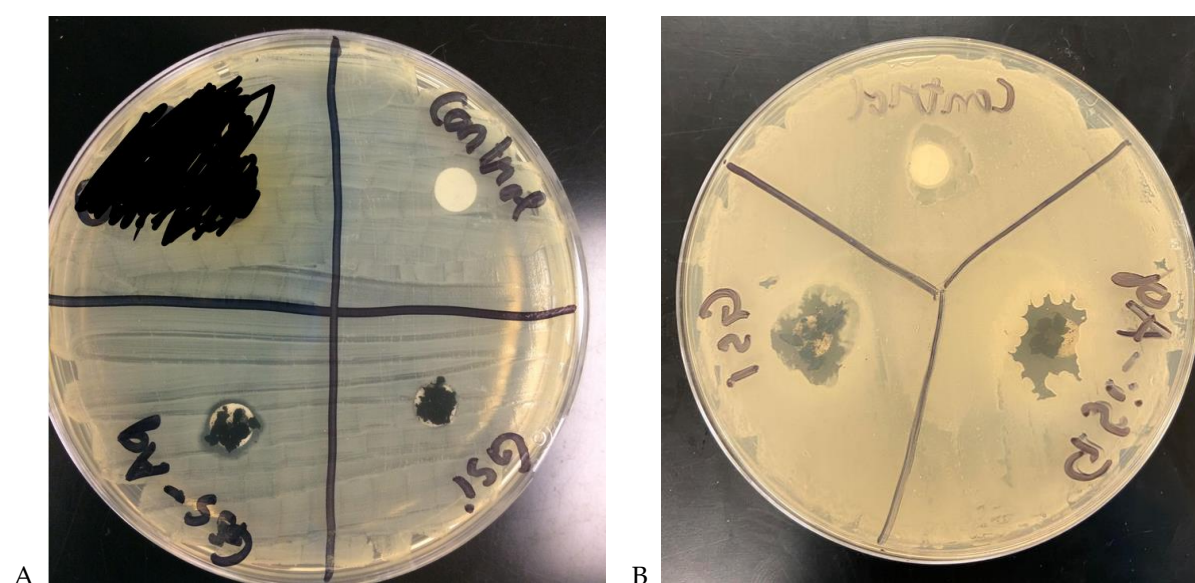

**Figure S3:** Examples of Kirby-Bauer disk diffusion images of A) GO/NS and GO/NS/AgNPs against *E. coli*, B) GO/NS and GO/NS/AgNPs against *B. subtilis*
